# Supplementary material
Source: ML conference proceedings conference paper supplement (https://aclanthology.org/D19-1060)
Supplement: Attachment [file D19-1060.Attachment.zip]

# Evaluation Benchmarks and Learning Criteria for Discourse-Aware Sentence Representations

Mingda Chen<sup>2\*</sup> Zewei Chu<sup>1\*</sup> Kevin Gimpel<sup>2</sup>

<sup>1</sup>University of Chicago, IL, USA

<sup>2</sup>Toyota Technological Institute at Chicago, IL, USA

{mchen, kgimpel}@ttic.edu, zeweichu@uchicago.edu

| RST-DT               |
|----------------------|
| Attribution          |
| Background           |
| Cause                |
| Comparison           |
| Condition            |
| Contrast             |
| Elaboration          |
| Enablement           |
| Evaluation           |
| Explanation          |
| Joint                |
| Manner-Means         |
| Same-unit            |
| Summary              |
| Temporal             |
| Textual-organization |
| Topic-Change         |
| Topic-Comment        |

Table 1: 18 coarse-grained relations in RST-DT

## A Hyperparameters

Our models use 1200 dimensional BiGRUs, resulting in 2400 dimensional sentence representations. The feedforward neural networks used in the decoders are parameterized using two hidden layers and use ReLU activation functions. We initialize our models with 300 dimensional GloVe embeddings (Pennington et al., 2014). We use Adam (Kingma and Ba, 2014) as optimizer and train our models for one epoch on Wikipedia without employing early stopping.

## References

- Diederik P Kingma and Jimmy Ba. 2014. Adam: A method for stochastic optimization. *arXiv preprint arXiv:1412.6980*.
- Jeffrey Pennington, Richard Socher, and Christopher Manning. 2014. [Glove: Global vectors for word representation](#). In *Proceedings of the 2014 Conference on Empirical Methods in Natural Language*

\*Equal contribution. Listed in alphabetical order.

| PDTB-E                     | PDTB-I                  |
|----------------------------|-------------------------|
| Comparison.Concession      | Comparison.Concession   |
| Comparison.Contrast        | Comparison.Contrast     |
| Contingency.Cause          | Contingency.Cause       |
| Contingency.Condition      | Contingency.Prag cause  |
| Contingency.Prag condition | Expansion.Alternative   |
| Expansion.Alternative      | Expansion.Conjunction   |
| Expansion.Conjunction      | Expansion.Instantiation |
| Expansion.Instantiation    | Expansion.List          |
| Expansion.List             | Expansion.Restatement   |
| Expansion.Restatement      | Temporal.Asynchronous   |
| Temporal.Asynchronous      | Temporal.Synchrony      |
| Temporal.Synchrony         |                         |

Table 2: The PDTB relation categories

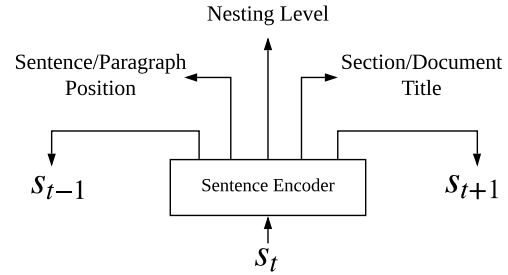

Figure 1: Schematic showing multitask training for our sentence embedding model.

*Processing (EMNLP)*, pages 1532–1543. Association for Computational Linguistics.
